# Supplementary material for: Therapeutic role of Wuda granule in gastrointestinal motility disorder through promoting gastrointestinal motility and decreasing inflammatory level
Source: Front Pharmacol. 2023 Aug 21;14:1237686. doi: 10.3389/fphar.2023.1237686 (PMC10476622; doi:10.3389/fphar.2023.1237686)
Supplement: Supplementary file 2 [file DataSheet1.xlsx]

## Sheet: Data1
Data of inflammation and oxidative stress indicators in rats
Expression level of IL1-beta					Expression level of TNFα
Sham group	POI group	WDG group	Prucalopride group		Sham group	POI group	WDG group	Prucalopride group
312.775	314.004	222.991	337.788		1.17761	2.24186	1.27653	1.47437
54.0044	422.991	414.712	33.0745		1.47943	1.68902	1.7963	1.59303
134.931	641.606	385.862	31.8932		1.24337	2.20373	1.90524	1.7246
94.2253	143.656	71.0076	125.367		1.83243	1.86874	1.61841	1.5533
49.5018	160.559	74.4864	114.606		1.83243	2.59303	1.65362	1.44191
51.2518	238.342	126.561	109.987		1.94191	2.68902	1.8104	1.41105
50.6686	420.604	54.1652	77.0105		1.97877	1.76036	1.90524	1.97877
61.1435	534.844	84.3458	252.395		1.54855	2.54855	1.44514	1.47943
16.4101	331.893	125.962	21.2013		1.58339	3.25262	1.58339	1.76036
133.13	149.472	87.8294	75.6459		1.47943	2.67303	1.94191	1.17761
Expression level of CRP					Expression level of IL6
Sham group	POI group	WDG group	Prucalopride group		Sham group	POI group	WDG group	Prucalopride group
954.695	2623.73	1484.96	1557.62		3.56612	62.2776	25.6013	14.0677
905.285	2549.2	1898.93	1335.8		2.12035	23.8531	12.4445	15.096
1256.62	2765.86	1568.55	1361.05		6.80653	39.2123	37.7072	26.7221
1361.05	4483.52	2358.82	1174.66		5.41615	35.8752	27.1046	30.9003
1281.38	3702.39	3812.23	3019.37		3.66662	43.3917	25.0886	16.1332
2041.91	3770.85	1448.33	1364.03		4.19588	37.9614	2.75566	9.08593
2658.45	6025.45	2596.86	1014.32		4.09485	26.5697	27.3144	30.2113
1952.91	2873.22	1590.48	3358.77		4.19588	19.3245	9.67952	8.74224
984.39	3208.25	2110.79	1747.29		6.87164	39.1616	17.5757	9.67952
1014.32	2045.15	1772.75	2197.83		2.75566	21.5075	15.7572	8.87854
Expression level of IL10					Expression level of MDA
Sham group	POI group	WDG group	Prucalopride group		Sham group	POI group	WDG group	Prucalopride group
4.14152	28.6377	13.0232	11.9538		272.77	363.699	253.882	318.438
4.06888	38.4604	7.37058	12.87		356.142	799.675	383.45	301.578
8.15067	8.97185	5.93157	14.5622		218.225	629.226	344.582	384.942
2.94723	12.6405	9.19651	8.97185		177.355	554.939	265.43	420.046
8.03901	20.0933	6.66794	12.717		211.95	512.412	301.578	377.592
4.46881	11.4975	4.39602	9.23398		174.232	563.707	388.342	184.666
7.77874	27.0644	19.0213	11.9919		140.525	299.319	233.942	336.11
1.08372	3.27205	8.15067	9.0467		143.992	227.007	240.434	244.502
7.51821	29.7661	11.0121	7.98759		299.319	562.434	392.977	404.069
11.5349	30.1468	13.2581	10.49		227.007	383.582	363.699	273.31
Expression level of SOD					Expression level of AGEs
Sham group	POI group	WDG group	Prucalopride group		Sham group	POI group	WDG group	Prucalopride group
40.6004	467.223	233.854	183.536		193.778	243.616	263.845	204.937
124.378	316.522	188.271	115.908		140.547	408.442	144.293	101.089
107.543	225.672	150.698	134.884		111.919	345.37	163.463	247.935
81.1831	195.114	191.058	105.49		108.098	534.008	212.132	208.124
61.7508	357.149	149.402	229.479		185.841	547.676	224.055	233.609
54.7192	205.692	270.724	113.941		147.49	270.207	112.301	150.685
71.1934	357.149	109.167	84.2056		149.088	416.62	262.254	203.343
215.457	205.692	124.113	332.447		141.097	227.24	204.937	104.293
190.621	428.592	225.672	184.141		85.0588	320.436	109.497	158.073
205.416	467.223	246.385	141.829		94.679	325.518	156.954	93.188
Expression level of VIP					Expression level of Ghrelin
Sham group	POI group	WDG group	Prucalopride group		Sham group	POI group	WDG group	Prucalopride group
162.141	64.509	143.162	153.014		764.102	346.05	903.526	507.734
175.618	48.5474	197.46	108.802		1321.27	354.188	513.284	585.87
112.82	58.6935	132.661	77.6575		1616.03	347.406	922.74	673.364
194.026	45.7716	80.892	152.725		2224.4	367.756	576.304	1071.76
108.018	43.7426	126.89	85.067		1759.76	375.9	644.564	951.728
133.588	56.9545	97.7095	95.689		1616.03	413.934	1775.01	792.294
63.226	60.9765	150.901	161.751		1353.91	505.136	864.318	859.05
169.762	53.803	78.1595	95.793		769.612	437.048	662.388	1574.61
132.004	63.226	139.906	191.191		1242.06	394.91	732.442	974.488
123.477	113.303	130.773	98.002		889.806	405.78	877.342	961.972

## Sheet: Data2
Gastrointestinal motility index data of rats
	The contraction amplitude of gastric antrum /g							The contraction tension of gastric antrum /g
		Sham group	POI group	WDG group	Prucalopride group				Sham group	POI group	WDG group	Prucalopride group
	Brfore intervention	0.81501	0.79997	1.18588	0.91013			Brfore intervention	0.91501	1.29997	1.38588	2.14964
	Brfore intervention	0.71228	0.72834	0.74875	1.38514			Brfore intervention	0.71228	0.92834	1.34875	0.91013
	Brfore intervention	1.52215	0.77751	1.71192	0.86682			Brfore intervention	2.32215	2.27751	1.41192	1.38514
	Brfore intervention	0.70779	1.16079	0.8369	0.62473			Brfore intervention	0.90779	1.00749	1.6369	0.86682
	Brfore intervention	0.67868	0.97301	1.46389	1.21627			Brfore intervention	0.77868	0.97301	1.46389	1.22473
	Brfore intervention	0.7861	1.4881	0.9883	0.74335			Brfore intervention	2.5861	1.1881	1.3883	2.21627
	Brfore intervention	1.7866	0.96969	0.91293	1.05532			Brfore intervention	1.0866	1.16969	0.77223	1.54335
	Brfore intervention	0.94105	1.09688	0.77942	1.7116			Brfore intervention	0.94105	2.29688	1.51413	1.35532
	Brfore intervention	1.40846	1.42031	1.7341	0.8243			Brfore intervention	2.40846	1.42031	1.31293	1.8116
	Brfore intervention	0.77223	0.61413	0.91742	1.03752			Brfore intervention	1.37942	1.2341	2.14782	0.9243
	After intervention	0.74572	0.30358	0.75901	1.51875			After intervention	0.74572	0.5955	0.86218	1.8308
	After intervention	0.60147	0.34964	0.69578	0.73547			After intervention	1.63195	0.76013	0.94873	0.93731
	After intervention	1.50261	0.16037	0.67857	0.70215			After intervention	2.10261	0.6947	2.16492	1.1156
	After intervention	0.79502	0.20147	0.87512	0.82486			After intervention	0.97123	0.7402	1.05912	1.71286
	After intervention	0.86556	0.21451	0.95342	0.52415			After intervention	1.60516	0.5326	1.6023	1.2571
	After intervention	0.85029	0.21145	0.77489	0.82551			After intervention	0.85029	0.48119	0.88084	1.66771
	After intervention	0.93006	0.21045	0.54387	0.97145			After intervention	0.89795	0.34583	0.97151	1.01987
	After intervention	0.84447	0.35078	0.77574	0.94412			After intervention	1.13307	0.595	1.08092	1.10132
	After intervention	1.31694	0.29874	0.57524	0.56124			After intervention	1.9441	0.47637	1.10793	0.9076
	After intervention	1.46258	0.21048	0.56548	0.62106			After intervention	1.01735	0.6618	1.0461	0.97946
	The contraction frequency of gastric antrum (time/min)							The contraction amplitude of duodenum /g
		Sham group	POI group	WDG group	Prucalopride group				Sham group	POI group	WDG group	Prucalopride group
	Brfore intervention	0.745742	1.03994	1.64349	1.95645			Brfore intervention	0.15939	0.32641	0.32748	0.30434
	Brfore intervention	0.507343	0.676147	1.00988	1.26066			Brfore intervention	0.29785	0.28754	0.32514	0.35752
	Brfore intervention	3.53466	1.77079	2.41709	1.20067			Brfore intervention	0.14923	0.28824	0.47851	0.24478
	Brfore intervention	0.642525	1.16948	1.36992	0.541528			Brfore intervention	0.25798	0.5173	0.56782	0.60181
	Brfore intervention	0.528475	0.946748	2.14297	1.4896			Brfore intervention	0.39061	0.37754	0.254305	0.33359
	Brfore intervention	2.03293	1.76801	1.37206	1.64746			Brfore intervention	0.48274	0.41883	0.49621	0.4569
	Brfore intervention	1.94132	1.13424	0.704992	1.62873			Brfore intervention	0.54029	0.46075	0.29705	0.37246
	Brfore intervention	0.885575	2.5194	1.18014	2.31977			Brfore intervention	0.37236	0.56272	0.25826	0.58866
	Brfore intervention	3.39222	2.01728	2.27675	1.4933			Brfore intervention	0.60121	0.30382	0.47639	0.407508
	Brfore intervention	1.06523	0.757898	1.97045	0.958978			Brfore intervention	0.29504	0.32337	0.28665	0.25609
	After intervention	0.556098	0.180782	0.654403	2.78053			After intervention	0.39768	0.1909	0.22384	0.45567
	After intervention	0.981569	0.265772	0.660107	0.689363			After intervention	0.25734	0.14597	0.43394	0.45839
	After intervention	3.1594	0.111409	1.46905	0.783319			After intervention	0.23912	0.10352	0.68539	0.28277
	After intervention	0.772147	0.149128	0.926857	1.41287			After intervention	0.23833	0.101	0.63403	0.09426
	After intervention	1.38936	0.114248	1.52767	0.658909			After intervention	0.27675	0.06598	0.58815	0.28395
	After intervention	0.722993	0.101748	0.682554	1.37671			After intervention	0.35109	0.15174	0.32429	0.16875
	After intervention	0.835147	0.07278	0.528375	0.990753			After intervention	0.52594	0.08829	0.77043	0.19008
	After intervention	0.956844	0.208714	0.838513	1.03978			After intervention	0.46988	0.09593	0.31178	0.61241
	After intervention	2.56026	0.142311	0.637326	0.509381			After intervention	0.4144	0.05281	0.11488	0.318285
	After intervention	1.48796	0.139296	0.591549	0.608303			After intervention	0.53954	0.1475	0.17601	0.77913
	The contraction tension of duodenum /g							The contraction frequency of duodenum (time/min)
		Sham group	POI group	WDG group	Prucalopride group				Sham group	POI group	WDG group	Prucalopride group
	Brfore intervention	0.23233	0.23954	0.18706	0.20434			Brfore intervention	0.037031	0.078188	0.061258	0.062189
	Brfore intervention	0.15734	0.30121	0.20549	0.26598			Brfore intervention	0.046864	0.08661	0.066813	0.095093
	Brfore intervention	0.4144	0.27913	0.28829	0.45174			Brfore intervention	0.061841	0.080456	0.13795	0.110577
	Brfore intervention	0.23912	0.20185	0.42514	0.20181			Brfore intervention	0.061688	0.104417	0.241403	0.121451
	Brfore intervention	0.39593	0.17754	0.17851	0.15359			Brfore intervention	0.154654	0.067028	0.045396	0.051236
	Brfore intervention	0.201	0.41883	0.168921	0.1569			Brfore intervention	0.097031	0.175419	0.08382	0.071688
	Brfore intervention	0.34029	0.26075	0.35403	0.37246			Brfore intervention	0.183855	0.120141	0.105165	0.138726
	Brfore intervention	0.37236	0.36272	0.17114	0.38866			Brfore intervention	0.138652	0.20411	0.044199	0.228789
	Brfore intervention	0.25293	0.26572	0.25386	0.274435			Brfore intervention	0.152064	0.080731	0.120936	0.111834
	Brfore intervention	0.26352	0.27053	0.30127	0.26874			Brfore intervention	0.077749	0.087481	0.086359	0.068822
	After intervention	0.31529	0.05939	0.22384	0.25567			After intervention	0.125385	0.011338	0.050104	0.116501
	After intervention	0.21726	0.05785	0.13394	0.25839			After intervention	0.05591	0.008444	0.058122	0.118443
	After intervention	0.20352	0.04923	0.18539	0.18277			After intervention	0.048666	0.005096	0.127064	0.051682
	After intervention	0.25774	0.05798	0.13403	0.19426			After intervention	0.061427	0.005856	0.084979	0.018311
	After intervention	0.17675	0.09061	0.18815	0.18395			After intervention	0.048916	0.005978	0.11066	0.052233
	After intervention	0.25109	0.08274	0.32429	0.34401			After intervention	0.088155	0.012555	0.105164	0.058052
	After intervention	0.22594	0.05281	0.27043	0.19008			After intervention	0.118831	0.004663	0.208347	0.03613
	After intervention	0.36988	0.0475	0.21178	0.21241			After intervention	0.173799	0.004557	0.066029	0.130082
	After intervention	0.252184	0.08824	0.16977	0.22753			After intervention	0.104505	0.00466	0.019503	0.072419
	After intervention	0.2785	0.07173	0.16071	0.24261			After intervention	0.150262	0.01058	0.028287	0.189025
	The contraction amplitude of jejunum /g							The contraction tension of jejunum /g
		Sham group	POI group	WDG group	Prucalopride group				Sham group	POI group	WDG group	Prucalopride group
	Brfore intervention	0.35616	0.34265	0.224344	0.256653			Brfore intervention	0.35616	0.24265	0.25398	0.34746
	Brfore intervention	0.37057	0.3024	0.225376	0.33492			Brfore intervention	0.27057	0.3024	0.24592	0.44698
	Brfore intervention	0.44796	0.25948	0.2786	0.27563			Brfore intervention	0.34796	0.25948	0.3786	0.26773
	Brfore intervention	0.27216	0.4807	0.23822	0.31208			Brfore intervention	0.27216	0.4807	0.23822	0.28102
	Brfore intervention	0.25604	0.45631	0.30739	0.29162			Brfore intervention	0.40059	0.35214	0.30739	0.24379
	Brfore intervention	0.28274	0.26701	0.48201	0.37235			Brfore intervention	0.28274	0.26431	0.48201	0.25762
	Brfore intervention	0.30134	0.23846	0.35004	0.26307			Brfore intervention	0.24134	0.24083	0.35004	0.29081
	Brfore intervention	0.32671	0.31608	0.24483	0.22475			Brfore intervention	0.310217	0.26372	0.24483	0.22538
	Brfore intervention	0.25382	0.22456	0.27651	0.24328			Brfore intervention	0.26304	0.25628	0.27651	0.40319
	Brfore intervention	0.34736	0.3083	0.35926	0.35489			Brfore intervention	0.22175	0.32374	0.22937	0.20248
	After intervention	0.2712	0.11554	0.27564	0.26019			After intervention	0.21554	0.1712	0.27564	0.32373
	After intervention	0.20788	0.10027	0.23815	0.2696			After intervention	0.30027	0.10788	0.23815	0.27799
	After intervention	0.26228	0.1184	0.24214	0.36432			After intervention	0.4184	0.16228	0.24214	0.2696
	After intervention	0.29305	0.12373	0.3206	0.4114			After intervention	0.29845	0.15968	0.21774	0.23457
	After intervention	0.43483	0.15267	0.2415	0.34773			After intervention	0.23483	0.08773	0.2415	0.291
	After intervention	0.28849	0.11774	0.20314	0.24161			After intervention	0.32649	0.14161	0.30314	0.34104
	After intervention	0.46733	0.14746	0.28549	0.2547			After intervention	0.21993	0.14547	0.38343	0.25604
	After intervention	0.317866	0.14356	0.26971	0.23835			After intervention	0.287701	0.13835	0.26971	0.21715
	After intervention	0.35968	0.10059	0.21104	0.31334			After intervention	0.34719	0.11334	0.2206	0.29527
	After intervention	0.2597	0.163245	0.25704	0.27741			After intervention	0.32906	0.10528	0.27734	0.33572
	The contraction frequency of jejunum (time/min)
		Sham group	POI group	WDG group	Prucalopride group
	Brfore intervention	0.12685	0.083144	0.056979	0.089177
	Brfore intervention	0.100265	0.091446	0.055424	0.149703
	Brfore intervention	0.155872	0.06733	0.105478	0.073794
	Brfore intervention	0.074071	0.231072	0.056749	0.087701
	Brfore intervention	0.102567	0.160685	0.094489	0.071094
	Brfore intervention	0.079942	0.070573	0.232334	0.095925
	Brfore intervention	0.072725	0.057428	0.122528	0.076503
	Brfore intervention	0.101351	0.083357	0.059942	0.050654
	Brfore intervention	0.066765	0.05755	0.076458	0.098088
	Brfore intervention	0.077027	0.099809	0.082403	0.071858
	After intervention	0.058454	0.01978	0.075977	0.084231
	After intervention	0.06242	0.010817	0.056715	0.074946
	After intervention	0.109738	0.019214	0.058632	0.098221
	After intervention	0.087461	0.019757	0.069807	0.096502
	After intervention	0.102111	0.013394	0.058322	0.101189
	After intervention	0.094189	0.016673	0.06158	0.082399
	After intervention	0.10278	0.021451	0.109465	0.065213
	After intervention	0.09145	0.019862	0.072743	0.051758
	After intervention	0.124877	0.011401	0.046555	0.09252
	After intervention	0.085457	0.017186	0.071287	0.093132

## Sheet: Data3
Gastrointestinal motility index data of human
	Number of MMC		After surgery				The time of MMC phase I		After surgery
		Before surgery	1 day .	2 day	3 day			Before surgery	1 day .	2 day	3 day
	WDG group	1	0	1	1		WDG group	21	77	41	32
	WDG group	2	0	0	2		WDG group	45	82	46	22
	WDG group	1	0	3	1		WDG group	33	58	65	42
	WDG group	2	0	1	2		WDG group	28	72	55	19
	WDG group	1	0	1	1		WDG group	49	89	70	31
	WDG group	1	0	0	2		WDG group	52	82	65	45
	WDG group	0	0	0	0		WDG group	27	75	27	22
	WDG group	1	0	1	0		WDG group	56	75	47	35
	WDG group	1	0	0	1		WDG group	19	80	38	43
	WDG group	1	0	0	1		WDG group	28	70	65	25
	WDG group	1	0	0	1		WDG group	35	76	28	53
	WDG group	1	0	0	1		WDG group	42	77	23	27
	WDG group	2	0	0	1		WDG group	57	83	35	65
	WDG group	0	0	0	2		WDG group	75	80	68	34
	Placebo group	2	0	0	0		Placebo group	58	75	61	68
	Placebo group	1	0	0	0		Placebo group	23	81	57	62
	Placebo group	2	0	1	0		Placebo group	18	92	60	50
	Placebo group	1	1	1	1		Placebo group	38	31	45	45
	Placebo group	0	1	1	1		Placebo group	17	65	58	48
	Placebo group	2	0	0	0		Placebo group	22	45	82	63
	Placebo group	1	0	0	0		Placebo group	46	81	76	35
	Placebo group	2	0	0	0		Placebo group	31	89	82	64
	Placebo group	2	0	0	0		Placebo group	76	76	64	50
	Placebo group	1	0	0	0		Placebo group	22	80	75	63
	Placebo group	1	0	0	0		Placebo group	45	75	75	69
	Placebo group	1	1	1	1		Placebo group	43	83	65	55
	The time of MMC phase II		After surgery				The contraction amplitude of gastric antrum in MMC phase II (mmHg)		After surgery
		Before surgery	1 day .	2 day	3 day			Before surgery	1 day .	2 day	3 day
	WDG group	63	43	65	67		WDG group	47	33	35	45
	WDG group	48	30	30	86		WDG group	42	21	41	46
	WDG group	59	22	69	63		WDG group	55.7	18.5	30	88
	WDG group	44	37	45	60		WDG group	57	28	38	42
	WDG group	55	31	76	48		WDG group	66	21	43	46
	WDG group	62	32	40	62		WDG group	32	24	75	75
	WDG group	70	32	34	95		WDG group	57	22	37	36
	WDG group	60	18	46	87		WDG group	66	15	38	68
	WDG group	68	30	40	95		WDG group	35	20	63	35
	WDG group	42	35	40	76		WDG group	64	32	33	62
	WDG group	50	30	46	60		WDG group	65	26	36	42
	WDG group	59	29	85	97		WDG group	43	23	37	39
	WDG group	45	27	46	48		WDG group	43	26.5	32	43
	WDG group	57	32	38	42		WDG group	42	26	66	78
	Placebo group	41	22	36	47		Placebo group	49	30	32	31
	Placebo group	42	25	40	47		Placebo group	62	29	36	29
	Placebo group	55	28	46	35		Placebo group	37	30	42	21
	Placebo group	45	20	50	40		Placebo group	67.3	45	38	24
	Placebo group	50	21	55	62		Placebo group	82	36	86	68
	Placebo group	32	25	36	49		Placebo group	43	19	21	29
	Placebo group	46	24	32	40		Placebo group	26.8	23	24	26
	Placebo group	48	31	38	46		Placebo group	56	32	33	35
	Placebo group	39	35	38	48		Placebo group	47	33	36	37
	Placebo group	62	17	39	45		Placebo group	68	25	26	28
	Placebo group	65	36	32	40		Placebo group	58	29	32	32
	Placebo group	37	23	42	65		Placebo group	41	19	35	57
	The contraction amplitude of duodenum in MMC phase II (mmHg)		After surgery				The contraction amplitude of jejunum in MMC phase II (mmHg)		After surgery
		Before surgery	1 day .	2 day	3 day			Before surgery	1 day .	2 day	3 day
	WDG group	25	10	24	28		WDG group	24	8.2	16	26.9
	WDG group	28	9	28	21		WDG group	26.5	10	29	45
	WDG group	23	9	24	25		WDG group	22	8	19.5	16
	WDG group	36	8.5	22	24		WDG group	23	8.3	23	25
	WDG group	21.2	9.5	24	28		WDG group	35	19	33	36
	WDG group	22.1	10	22	26		WDG group	23.3	9.5	20	24
	WDG group	36	10	22	45		WDG group	33	9.5	21	33
	WDG group	23	9	23	57		WDG group	21.6	9.1	15	35
	WDG group	21.3	5	18	21		WDG group	31	22	18.2	20.5
	WDG group	35	14	24	22.6		WDG group	34	13	24	22
	WDG group	33.8	13.6	28	29		WDG group	28.5	9.8	15	24.3
	WDG group	23.2	11	26	28		WDG group	23	10	24	26
	WDG group	26	15	24.2	25		WDG group	23.6	10	35	26
	WDG group	23	11	22	24		WDG group	22	9	20	21.3
	Placebo group	24	9	21.8	22		Placebo group	39	17	9	22
	Placebo group	36	11	20	23		Placebo group	33.2	21	30	13
	Placebo group	29	12	24.7	18		Placebo group	28.5	11.5	14	19
	Placebo group	33.7	12	21	29.5		Placebo group	36.3	12.5	17	17
	Placebo group	22.5	9	24	16		Placebo group	19	8.5	20	15
	Placebo group	24	13	15	19.2		Placebo group	23.2	6	16	19
	Placebo group	20	17	18.3	18		Placebo group	19.8	8	17	17.3
	Placebo group	23	12	19.8	24		Placebo group	22.2	8.8	15	15
	Placebo group	23	8	19.3	23		Placebo group	22.6	8.8	16	16
	Placebo group	18	7	19	20.6		Placebo group	18.9	8	18.6	19.3
	Placebo group	30	10	21	21		Placebo group	28	9.5	14	16
	Placebo group	23.8	13	20.3	26		Placebo group	18	7	17	17
	The contractive motility index of gastric antrum in MMC phase II		After surgery				The contractive motility index of duodenum in MMC phase II		After surgery
		Before surgery	1 day .	2 day	3 day			Before surgery	1 day .	2 day	3 day
	WDG group	2150	349	1320	2140		WDG group	3225	493	2010	3215
	WDG group	4156	420	1738	3012		WDG group	7792	360	3952	2276
	WDG group	4614	556	886	2261		WDG group	10466	2051	2554	6357
	WDG group	3495	950	1900	4208		WDG group	8789	1337	3000	4976
	WDG group	4784	390	642.5	3160		WDG group	6170	564	693	8377
	WDG group	3660	620	1306	3016		WDG group	5784	1288	2235	7622
	WDG group	3495	1544	1630	4527		WDG group	8789	2337	5560	7601
	WDG group	5640	699	1360	3108		WDG group	6184	1025	2318	5824
	WDG group	3780	360	2860	1415		WDG group	6858.6	892	4022	7135
	WDG group	3581	350	1900	3339		WDG group	3942	1400	2853	5000
	WDG group	3680	466	1315	2122		WDG group	8044	1033	3233	6059
	WDG group	2334	496	3407	3603		WDG group	8349	3810	5529	5700
	WDG group	4114	302	1590	3203		WDG group	9322	522	4071	6315
	WDG group	4960	153	828	2690		WDG group	5915	1764	3000	7368
	Placebo group	3816	602	960	1406		Placebo group	7906	799	1035	1833
	Placebo group	3425	286	1096	835		Placebo group	8370	1658	3360	3523
	Placebo group	4576	308	1329	1216		Placebo group	5742	669	3860	2010
	Placebo group	7753	204	1016	1549		Placebo group	12698	1833	5754	8083
	Placebo group	4785	490	2150	4720		Placebo group	6415	1315	3220	5006
	Placebo group	4530	463	920	1428		Placebo group	6583	1310	2016	2430
	Placebo group	4624	556	986	1106		Placebo group	6987	997	1354	2332
	Placebo group	3060	252	489	769		Placebo group	5128	546	628	4864
	Placebo group	4320	350	718	2318		Placebo group	7535	960	1436	2955
	Placebo group	3841	305	678	768		Placebo group	3242	760	1336	2896
	Placebo group	3624	656	886	1381		Placebo group	11466	1023	1554	3132
	Placebo group	3593	348	678	2508		Placebo group	4384	563	2436	3744
	The contractive motility index of jejunum in MMC phase II		After surgery
		Before surgery	1 day .	2 day	3 day
	WDG group	3862	484	2112	3678
	WDG group	7693	468	1841	2397
	WDG group	5223	1090	4976	4882
	WDG group	6185	1456	3059	5613
	WDG group	6075	1323	2016	3800
	WDG group	5644	1660	2770	5013
	WDG group	4824	1044	3430	6219
	WDG group	6170	985	2800	3056
	WDG group	7065.6	1021	1638	2544
	WDG group	8880	490	2789	1530
	WDG group	6469	975	1870	3040
	WDG group	5945	103	4411	4673
	WDG group	8485	930	2029	5870
	WDG group	5292	1212	2374	3357
	Placebo group	8106	137	1192	1845
	Placebo group	5698	1646	2679	2679
	Placebo group	6946	1031	2600	2424
	Placebo group	4184	1390	2100	3824
	Placebo group	7560	1315	2667	2823
	Placebo group	6877	1268	2117	2673
	Placebo group	7262	296	960	1833
	Placebo group	4912	468	1709	836
	Placebo group	7816	1130	2839	2182
	Placebo group	3380	510	1124	2838
	Placebo group	3123	790	1740	1882
	Placebo group	5454	452	2135	1980

## Sheet: Data4
Data of inflammation and oxidative stress indicators in human
The expression of TNFα (pg/ml)		After surgery						The expression of IL6 (pg/ml)		After surgery
	Before surgery	1 day .	2 day	3 day	7day				Before surgery	1 day .	2 day	3 day	7day
WDG group	5.22	13.51	8.43	6.03	4.89			WDG group	5.25	21.8	10.1	16.32	2
WDG group	5.08	10.13	7.65	6.38	5.15			WDG group	4.76	85	30.7	15.33	3.12
WDG group	11.2	14.8	8.11	5.21	6.2			WDG group	4.22	54.7	26.8	9.68	4.18
WDG group	5.12	7.84	5.9	4.56	3.21			WDG group	2.34	40.9	26.4	11.7	2.56
WDG group	6.74	8.99	6.64	5.32	5.21			WDG group	13.7	79.1	42.11	21.07	5.23
WDG group	7.13	14.11	7.2	6.45	5.77			WDG group	3.44	57	50.2	18.26	12.56
WDG group	6.7	13.13	12.2	11.9	10.5			WDG group	3.68	63.2	22.2	5.72	3.25
WDG group	4.18	9.28	6.43	6.25	7.54			WDG group	5.07	28.4	18.1	7.03	5.01
WDG group	5.34	9.88	6.12	5.96	4.55			WDG group	12.9	50.33	15.21	30.22	4.6
WDG group	4.66	9.31	7.25	6.03	4.54			WDG group	12.5	56.1	20.12	17.5	2.2
WDG group	4.28	12.14	6.23	5.03	4.19			WDG group	2.55	92.4	19.4	11.5	4.43
WDG group	6.25	8.44	7.36	5.16	5.18			WDG group	9.81	90.3	27.4	18.5	2.23
WDG group	4.85	9.03	7.25	5.08	4.26			WDG group	4.18	92.2	9.43	5.11	4.09
WDG group	6.32	12.5	10.5	7.21	6.32			WDG group	4.09	77.9	20.4	12.33	2.22
Placebo group	8.83	12.02	9.32	8.32	7.05			Placebo group	2.55	80.5	33.1	13.1	17.1
Placebo group	5.14	17.85	11.9	9.03	6.54			Placebo group	2	35.3	25.33	14.5	9.43
Placebo group	7.7	10.23	8.87	9.42	8.03			Placebo group	13.66	79.1	60.33	15.12	18.9
Placebo group	6.9	9.22	10.33	7.57	8.63			Placebo group	1.99	79.2	60.5	31	15
Placebo group	5.82	8.51	9.18	7.24	6.17			Placebo group	15	61	23	27.6	16.21
Placebo group	5.58	14.9	12.23	9.32	7.54			Placebo group	1.98	46.2	29.44	23.2	19.88
Placebo group	6.82	9.07	7.31	10.3	7.09			Placebo group	1.99	26	24.7	16.4	14
Placebo group	6.31	7.82	7.62	6.95	6.52			Placebo group	2.59	31.56	26.33	14.41	12.17
Placebo group	6.25	10.36	7.36	6.99	6.71			Placebo group	1.98	72.2	26.73	14.42	23.88
Placebo group	9.29	13.7	11.2	10.9	9.32			Placebo group	1.98	35.3	15.4	17.32	18.43
Placebo group	4.75	10.56	8.98	8.03	6.32			Placebo group	2.75	69.2	39.2	17.1	14.08
Placebo group	6.77	12.05	10.22	8.8	7.63			Placebo group	9.81	33.8	28.5	21.1	18.5
The expression of IL4 (pg/ml)		After surgery						The expression of Motilin (pg/ml)		After surgery
	Before surgery	1 day .	2 day	3 day	7day				Before surgery	1 day .	2 day	3 day	7day
WDG group	1.19	5.38	3.21	1.17	0.88			WDG group	29.28	13.25	14.23	25.62	31.22
WDG group	1.13	3.1	1.94	1.12	0.94			WDG group	18.33	16.23	17.92	33.67	41.45
WDG group	1.56	3.99	2.32	1.98	0.98			WDG group	15.89	12.48	14.5	15.2	18.37
WDG group	0.31	2.23	1.13	0.5	0.22			WDG group	17.97	30.55	32.79	46.9	43.33
WDG group	1.26	2.82	1.72	1.52	1.11			WDG group	40.26	25.33	34.02	39.12	45.23
WDG group	1.56	2.18	2.22	1.89	1.63			WDG group	25.91	5.45	14.33	20.12	28.97
WDG group	2.98	6.17	3.23	1.44	0.88			WDG group	19.19	6.71	14.55	25.05	26.38
WDG group	1.31	4.26	2.24	1.31	1.13			WDG group	56.37	32.45	45.55	53.66	63.86
WDG group	1.68	4.23	2.11	1.3	0.94			WDG group	37.14	10.71	28.24	34.32	53.54
WDG group	2.19	5.45	3.23	2.05	1.91			WDG group	46.26	14.33	38.54	46.92	62.74
WDG group	1.92	2.58	1.74	1.52	0.88			WDG group	66.18	29.79	35.83	66.83	80.12
WDG group	0.31	1.68	0.96	0.5	0.11			WDG group	17.97	22.18	25.55	26.31	32.85
WDG group	1.19	2.38	1.12	0.82	0.73			WDG group	25.55	32.45	42.87	52.36	57.33
WDG group	1.56	3.11	1.86	1.1	0.31			WDG group	35.83	29.79	66.83	73.26	87.49
Placebo group	1.19	3.25	2.6	2.36	1.94			Placebo group	27.97	15.55	17.66	22.18	25.12
Placebo group	1.42	1.67	2.13	1.95	1.66			Placebo group	32.1	5.5	13.35	26.71	28.99
Placebo group	1.5	2.98	2.11	1.38	1.53			Placebo group	35.83	15.49	14.83	18.25	29.79
Placebo group	1.63	3.12	2.08	1.63	1.65			Placebo group	18.9	5.49	7.78	12.4	15.21
Placebo group	1.25	5.12	4.22	3.16	2.23			Placebo group	32.78	2.78	5.28	18.88	22.18
Placebo group	1.08	3.98	2.94	1.88	1.88			Placebo group	34.64	30.81	30.37	31.67	34.22
Placebo group	1.25	6.24	4.12	3.12	2.19			Placebo group	31.6	31.31	21.61	24.77	29.19
Placebo group	1.56	1.38	1.38	1.31	1			Placebo group	25.83	10.71	17.14	23.12	26.38
Placebo group	1.13	5.52	4.88	2.07	1.82			Placebo group	31.31	11.6	18.8	21.61	29.35
Placebo group	1.06	2.56	2.23	1.19	1.13			Placebo group	31.6	14.32	21.61	24.77	31.33
Placebo group	1.23	2.66	3.32	2.89	2.13			Placebo group	89.36	20.53	40.8	63.42	70.35
Placebo group	1.14	2	2.34	1.97	1.53			Placebo group	22.78	11.55	15.91	18.81	23.11
The expression of Ghrelin (pg/ml)		After surgery
	Before surgery	1 day .	2 day	3 day	7day
WDG group	208.98	47.56	102.11	153.47	238.25
WDG group	321.62	19.6	76.31	291.66	356.78
WDG group	208.98	37.56	121.62	153.47	216.14
WDG group	142.22	14.22	95.11	92.83	88.33
WDG group	70.67	13.87	64.01	94.01	98.45
WDG group	376.04	23	171.23	222.22	420.35
WDG group	142.34	16.1	76.32	147.52	165.33
WDG group	183.22	14.6	145.8	67.89	103.54
WDG group	89.63	15.33	73.12	72.53	95.24
WDG group	133.82	30.28	79.74	98.34	136.74
WDG group	92.68	14.24	83.82	63.36	102.52
WDG group	133.82	60.28	79.74	96.11	156.21
WDG group	147.06	27.11	156.04	98.13	166.95
WDG group	179.66	38.25	168.08	132.3	209.43
Placebo group	305.56	19.6	56.31	106.31	191.66
Placebo group	107.35	37.55	65.15	70.23	102.13
Placebo group	143.72	14.24	43.82	41.38	43.36
Placebo group	63.22	12.15	23.1	41.38	33.36
Placebo group	107.35	37.55	65.15	82.13	70.23
Placebo group	208.98	21.33	78.32	107.35	110.47
Placebo group	70.67	17.13	36.88	48.32	76.13
Placebo group	156.34	13.06	24.3	29.13	28.52
Placebo group	592.35	266.72	129.25	112.12	65.43
Placebo group	79.74	33.82	60.28	72.91	76.04
Placebo group	100.01	11.82	15.64	92.68	99.23
Placebo group	168.16	23.66	31.59	62.08	87.8
